# Supplementary material
Source: PubMed Central journal article supplement (PMC2823868)
Supplement: 0908239106_pnas.200908239SI.pdf [file 0908239106_pnas.200908239SI.pdf]

# Supporting Information

Sauter et al. 10.1073/pnas.0908239106

**Table S1. Categories and stories used for the production and recognition of nonverbal emotional vocalizations**

| Emotion     | Story                                                                                                                                                                                                                                      |
|-------------|--------------------------------------------------------------------------------------------------------------------------------------------------------------------------------------------------------------------------------------------|
| Achievement | English version: Someone gets a phone call and is offered a job that they really want and they feel like they want to celebrate.<br>Himba version: Someone manages to kill a lion by themselves and they feel like they want to celebrate. |
| Amusement   | Someone is being tickled by a child and finds it very funny.                                                                                                                                                                               |
| Anger       | Someone is being treated in a rude way deliberately, and is very angry about it.                                                                                                                                                           |
| Disgust     | Someone has just eaten rotten food and feels very disgusted.                                                                                                                                                                               |
| Fear        | Someone is suddenly faced with a dangerous animal and feels very scared.                                                                                                                                                                   |
| Pleasure    | Someone is having sex and enjoying it very much.                                                                                                                                                                                           |
| Relief      | Someone has just found their child after it was lost and they feel very relieved.                                                                                                                                                          |
| Sadness     | Someone finds out that a member of their family has died and they feel very sad.                                                                                                                                                           |
| Surprise    | Someone sees a bright light in the middle of the night and is very surprised.                                                                                                                                                              |

**Audio S1.** Himba vocalization samples (achievement, amusement, anger, disgust, fear, relief, sadness, sensual pleasure, and surprise).

[Audio S1.](#)

**Audio S2.** English vocalization samples (achievement, amusement, anger, disgust, fear, relief, sadness, sensual pleasure, and surprise).

[Audio S2.](#)

**Audio S3.** Himba story recordings (achievement, amusement, anger, disgust, fear, sensual pleasure, relief, sadness, and surprise).

[Audio S3.](#)

**Audio S4.** English story recordings (achievement, amusement, anger, disgust, fear, sensual pleasure, relief, sadness, and surprise).

[Audio S4.](#)
